# Supplementary material
Source: publisher figshare collection journal article supplement (https://gsajournals.figshare.com/ndownloader/files/14078120)
Supplement: Supplementary file 1 [file 14078120]

## Sheet: GSV's BHABHTBPA
Normalized data: normalized data of three different replicates averaged
BHA	WT 1	rad14	rad1	rad2	apn1	ogg1	rmr3	sir3	sir2,sir3	sir3,sir4	dnl4	hdf2	rad52	rad54	rad55	sgs1	sae2	rad27	mus81	rad59	srs2	WT 2
GSV	Average	0.339585	1.13563	4.78977	20.14	4.20551	0.31799	17.0928	4.45609	1.3632	19.4848	2.68179	20.9974	1.56679	18.297	2.05314	5.5833	24.034	14.6772	1.5022	1.28538
BHT
GSV	Average	1.0965	1.07602	1.01639	1.1061	1.08	0.916872	1.00129	1.02986	1.01513	1.05922	1.24444	1.06093	1.18912	1.02648	1.0315	1.03834	1.12965	1.01414	1.00808	1.01994
BPA
GSV	Average	0.393986	0.182762	0.572806	0.520749	3.4244	0.316478	0.15271	3.69086	0.271793	0.313018	0.109995	0.568974	4.82833	1.94068	0.220943	5.97439	0.238015	0.174945	1.14518	3.7568
	Deleted rad4,rad3-G5959R double mutant and pol3 from graph because they are not deletion strains.
normalized data for each replicate that was run
BHA treatment	WT 1	rad14	rad1	rad2	rad4,rad3-6	apn1	ogg1	rmr3	pol3	sir3	sir2,sir3	sir3,sir4	dnl4	hdf2	rad52	rad54	rad55	sg51	sae2	rad27	mus81	rad59	srs2	WT 2
1st dot	GSV	0.734151	1.10263	1.06233	1.51806	1.66021	1.19738	0.0102877	1.29215	1.73465	1.56715	1.62826	1.60462	1.30259	1.77866	1.29864	1.43788	1.50413	1.77341	2.10378	1.71473	2.02425	1.73866
1st dot		0.228703	0.508742	2.37273	5.37926	5.6774	0.599261	0.0198201	0.352691	6.12878	1.87804	0.961967	4.2708	0.575718	6.90752	0.562402	5.54353	0.921738	2.13195	8.09376	6.45525	0.845609	0.333265
1st dot		0.0559018	1.79551	10.9343	46.3598	53.0823	10.8199	0.923862	4.80514	43.4151	9.92306	1.49938	52.5789	6.16708	54.3061	2.83932	47.9095	3.73354	12.8445	61.9044	35.8617	1.63673	1.7842
Average		0.339585	1.13563	4.78977	17.7524	20.14	4.20551	0.31799	2.14999	17.0928	4.45609	1.3632	19.4848	2.68179	20.9974	1.56679	18.297	2.05314	5.5833	24.034	14.6772	1.5022	1.28538
BHT
1st Dot	GSV	1.26283	1.16489	1.06671	1.20826	1.2583	1.26609	1.0953	1.24439	1.26967	1.03037	1.13814	1.3351	1.49531	1.20654	1.42602	1.16171	1.17221	1.14665	1.25359	1.13366	1.13641	1.20884
1st Dot		0.970041	0.991783	0.905172	0.942753	0.919272	0.909791	0.710572	0.979721	0.779332	0.936651	0.889021	0.824451	1.21279	0.850513	1.05641	0.873217	0.863077	0.903356	0.973527	0.840851	0.895474	0.765351
1st Dot		1.05662	1.07138	1.07729	1.13863	1.14073	1.06411	0.944743	1.07034	0.954854	1.12256	1.01823	1.0181	1.02523	1.12573	1.08495	1.0445	1.05923	1.065	1.16182	1.0679	0.992339	1.08564
		1.0965	1.07602	1.01639	1.09655	1.1061	1.08	0.916872	1.09815	1.00129	1.02986	1.01513	1.05922	1.24444	1.06093	1.18912	1.02648	1.0315	1.03834	1.12965	1.01414	1.00808	1.01994
BPA
1st Dot	GSV	0.211081	0.0224721	0.601269	0.251821	0.32184	2.48823	0.147121	-0.0959059	0.000661336	1.69533	-0.0318709	0.0988274	0.119232	0.187614	6.72016	2.10036	0.271015	9.23918	0.129805	0.197146	3.39336	3.61241
1st Dot		0.614282	0.288739	0.586884	0.325643	0.464093	2.52292	0.0966715	0.0442646	0.0836962	3.01259	0.177383	0.370129	0.1281	0.74323	2.94567	1.4387	0.179289	3.23943	0.260604	0.163127	0.018452	2.26125
1st Dot		0.356596	0.237076	0.530264	0.740022	0.776313	5.26206	0.705641	0.0752538	0.373773	6.36467	0.669865	0.470096	0.0826528	0.776078	4.81915	2.28297	0.212525	5.44456	0.323637	0.164562	0.0237256	5.39675
		0.393986	0.182762	0.572806	0.439162	0.520749	3.4244	0.316478	0.00787084	0.15271	3.69086	0.271793	0.313018	0.109995	0.568974	4.82833	1.94068	0.220943	5.97439	0.238015	0.174945	1.14518	3.7568

## Sheet: Instructions
raw data: raw data was obtained by taking pictures of plates with pinned mutant strains on DMSO, BHA, BHT, and BPA plates.
Quantification: The growth of each spotted strain was quantified by calculating the pixel intensity of each dott and normalized using the following formula: Growth score value: GSV= Mutant Treated/ Mutant Untreated /Wt Treated/WT Untreated. There were 3 replicates for each treatment and were labelled with yellow, orange and red cells
Normalized data:
Yellow Highlight- data from June 13th pinning
Orange Highlight- data from June 9th (first set of plates)
Red Highlight - data from June 9th (second set of plates)

## Sheet: Data
Treatment	WT 1	mutant	mutant	mutant	mutant	mutant	mutant	mutant	mutant	mutant	mutant	mutant	mutant	mutant	mutant	mutant	mutant	mutant	mutant	mutant	mutant	mutant	mutant
CONTROL (DMSO)
_x0010_061711CIday4	WT 1	rad14	rad1	rad2	rad4,rad3-6	apn1	ogg1	rmr3	pol3	sir3	sir2,sir3	sir3,sir4	dal4	hdf2	rad52	rad54	rad55	sg51	sae2	rad27	mus81	rad59	srs2	_x0010_061711CIday4
1st Dot	307542	275544	275368	254693	275497	263720	268122	191923	282984	288016	206238	291185	284993	247196	305822	289420	230205	249539	222178	241070	313762	193921	288497	1st Dot
_x0010_061511CIday2	WT 1	rad14	rad1	rad2	rad4,rad3-6	apn1	ogg1	rmr3	pol3	sir3	sir2,sir3	sir3,sir4	dal4	hdf2	rad52	rad54	rad55	sg51	sae2	rad27	mus81	rad59	srs2	_x0010_061511CIday2
1st Dot	170579	130057	149688	133554	158369	158168	144056	72601.8	150567	166398	104031	176903	143804	112209	163554	163316	115380	141298	134490	148521	186823	113078	191395	1st Dot
_x000C_052411CI
1st Dot	71165.7	73327.3	72795	53779.4	72328.4	77142.1	81197.5	39138.2	69195.6	80421.6	62492.3	75209.2	91759.2	78275.4	82386.4	77300.5	63213.6	78594.7	69248.1	64086.7	74569.1	54005.3	89288
052411CII
1st Dot	75136	64860	70171	44542	67682	69237	72628	32305	66524	70590	54638	67150	77147	73979	74617	81301	56468	78641	68703	60936	67449	51095	65921
BHA
_x0014_061711BHA70Iday4
1st Dot	27421.3	18036.8	27072.3	24124.5	37289.7	39038.1	28625.2	176.047	32603	44546.4	28817.9	42274.1	40774.6	28709.9	48500.4	33511.9	29513.4	33466.3	35131.1	45219.6	47971	35000.3	44724
_x0012_052611BHA80Id8
1st Dot	12752	3005	6636	22865	69717	78478	8718.98	139	4373	88319	21030	12964	70221	8075	101973	7789.98	62792	12981	26454	92945	86254	8183.02	5332
_x0013_052611BHA80IId8
1st Dot	1452.37	70.0859	2435.42	9414.28	60651.7	71042.1	15189.9	576.906	6178.92	59239.6	10480.2	1946.19	78407.7	8818.94	78327.6	4462.09	52294.1	5675.42	17057.8	72916.1	46755.7	1616.53	2273.5
BHT
_x0014_061511BHT80Iday2	WT 1	rad14	rad1	rad2	rad4,rad3-6	apn1	ogg1	rmr3	pol3	sir3	sir2,sir3	sir3,sir4	dal4	hdf2	rad52	rad54	rad55	sg51	sae2	rad27	mus81	rad59	srs2
1st Dot	240238	231310	245579	200641	269494	280297	256868	111995	263877	297548	150964	283562	270398	236307	277921	327998	188775	233269	217189	262217	298284	180981	325848
_x0012_052611BHT80Id4
1st Dot	64717.4	64685.3	65655	44268.8	62009.3	64489	67179.2	25290.6	61649.7	56996.1	53229.8	60804.1	68796.2	86329.6	63721.6	74261.4	50197.6	61686.9	56887.5	56737	57020.1	43978.4	62144.7
_x0013_052411BHT80IId2
1st Dot	68980.1	62917.6	69020.2	44053.3	70750.9	72509.7	70952.2	28019.4	65369.4	61880.8	56309.6	62772.3	72108.4	69631.2	77116.7	80980.7	54148.7	76473.9	67174.1	64996.2	66127.6	46549.4	65703
BPA
_x0014_061711BPA80Iday4
1st Dot	69327	13111.1	1394.94	34521.1	15638.9	19132.9	150391	6365	-6117.94	42.9375	78817	-2092	6349.06	6644.06	12934	438436	108995	15245.1	462735	7053.94	13944	148338	234929
_x0012_052611BPA80Id4
1st Dot	45681.3	28913.5	13491.9	20259.9	15118.8	22980.8	131496	2428.66	1966.09	4320.62	120847	8563.48	21800.7	6436.39	39304.9	146162	58378	9045.14	143994	10720.5	7808.21	639.656	129601
_x0013_052611BPA80IId4
1st Dot	28201	8681	6243.98	8864.98	18799	20174	143442	8555.98	1878.98	9903.02	130523	16883	13612	2295	21735	147056	48386	6273	140396	7402	4166.02	455	133528
All data imported from Carestream
Yellow Highlight- data from June 13th pinning (note CIday2 was the control used for comparison with BHT and CIday4 is the control used for BHA and BPA)
Orange Highlight- data from June 9th (first set of plates)
Red Highlight - data from June 9th (second set of plates)
	WT 1	rad14	rad1	rad2	rad4,rad3-6	apn1	ogg1	rmr3	pol3	sir3	sir2,sir3	sir3,sir4	dal4	hdf2	rad52	rad54	rad55	sg51	sae2	rad27	mus81	rad59	srs2
GSV: (Mutant in phenol/mutant in DMSO x WT in DMSO/ WT in phenol)
BHA		0.734151	1.10263	1.06233	1.51806	1.66021	1.19738	0.0102877	1.29215	1.73465	1.56715	1.62826	1.60462	1.30259	1.77866	1.29864	1.43788	1.50413	1.77341	2.10378	1.71473	2.02425	1.73866
		0.228703	0.508742	2.37273	5.37926	5.6774	0.599261	0.0198201	0.352691	6.12878	1.87804	0.961967	4.2708	0.575718	6.90752	0.562402	5.54353	0.921738	2.13195	8.09376	6.45525	0.845609	0.333265
		0.0559018	1.79551	10.9343	46.3598	53.0823	10.8199	0.923862	4.80514	43.4151	9.92306	1.49938	52.5789	6.16708	54.3061	2.83932	47.9095	3.73354	12.8445	61.9044	35.8617	1.63673	1.7842
Average GSV BHA		0.339585	1.13563	4.78977	17.7524	20.14	4.20551	0.31799	2.14999	17.0928	4.45609	1.3632	19.4848	2.68179	20.9974	1.56679	18.297	2.05314	5.5833	24.034	14.6772	1.5022	1.28538
BHT		1.26283	1.16489	1.06671	1.20826	1.2583	1.26609	1.0953	1.24439	1.26967	1.03037	1.13814	1.3351	1.49531	1.20654	1.42602	1.16171	1.17221	1.14665	1.25359	1.13366	1.13641	1.20884
		0.970041	0.991783	0.905172	0.942753	0.919272	0.909791	0.710572	0.979721	0.779332	0.936651	0.889021	0.824451	1.21279	0.850513	1.05641	0.873217	0.863077	0.903356	0.973527	0.840851	0.895474	0.765351
		1.05662	1.07138	1.07729	1.13863	1.14073	1.06411	0.944743	1.07034	0.954854	1.12256	1.01823	1.0181	1.02523	1.12573	1.08495	1.0445	1.05923	1.065	1.16182	1.0679	0.992339	1.08564
Average GSV BHT		1.0965	1.07602	1.01639	1.09655	1.1061	1.08	0.916872	1.09815	1.00129	1.02986	1.01513	1.05922	1.24444	1.06093	1.18912	1.02648	1.0315	1.03834	1.12965	1.01414	1.00808	1.01994
BPA		0.211081	0.0224721	0.601269	0.251821	0.32184	2.48823	0.147121	-0.0959059	0.000661336	1.69533	-0.0318709	0.0988274	0.119232	0.187614	6.72016	2.10036	0.271015	9.23918	0.129805	0.197146	3.39336	3.61241
		0.614282	0.288739	0.586884	0.325643	0.464093	2.52292	0.0966715	0.0442646	0.0836962	3.01259	0.177383	0.370129	0.1281	0.74323	2.94567	1.4387	0.179289	3.23943	0.260604	0.163127	0.018452	2.26125
		0.356596	0.237076	0.530264	0.740022	0.776313	5.26206	0.705641	0.0752538	0.373773	6.36467	0.669865	0.470096	0.0826528	0.776078	4.81915	2.28297	0.212525	5.44456	0.323637	0.164562	0.0237256	5.39675
Average GSV BPA		0.393986	0.182762	0.572806	0.439162	0.520749	3.4244	0.316478	0.00787084	0.15271	3.69086	0.271793	0.313018	0.109995	0.568974	4.82833	1.94068	0.220943	5.97439	0.238015	0.174945	1.14518	3.7568
(Mutant in phenol/mutant in DMSO x WT in DMSO/ WT in phenol)
